# Supplementary material
Source: MDPI journal article supplement (https://www.mdpi.com/2076-0825/11/12/381)
Supplement: s1 [file s1]

## RESEARCH ARTICLE

WILEY

# Cascade active disturbance rejection control of single-rod electrohydrostatic actuator

Xiaoxia Han<sup>1</sup>  | Zhixiang Chen<sup>2</sup> | Yongbao Feng<sup>1</sup> | Jian Xie<sup>1</sup> | Xiaoling Wei<sup>1</sup> | Liejiang Wei<sup>3</sup>

<sup>1</sup>Rocket Force University of Engineering, Xi'an, China

<sup>2</sup>Rocket Force Sergeant Academy, Weifang, China

<sup>3</sup>Lanzhou University of Technology, Lanzhou, China

## Correspondence

Yongbao Feng, Rocket Force University of Engineering, Hong Qing Town, Xi'an 710025, China.

Email: [fyb1213@sina.com](mailto:fyb1213@sina.com)

## Abstract

Electrohydrostatic actuators (EHAs) are used to replace traditional centralized hydraulic systems to reduce weight and improve efficiency and maintainability. This paper proposes a cascade active disturbance rejection control (C-ADRC) method for single-rod EHAs with parametric uncertainties and severe external disturbances. The studied EHA can be transformed into a cascade connection of a first-order pressure system and a second-order position system. Two linear active disturbance rejection controllers are designed for the inner pressure system and the outer position system to estimate and compensate for various uncertainties in the two loops, respectively. The uniqueness of the C-ADRC is that the two linear active disturbance rejection controllers are designed by making full use of the measurable states and known model information of the EHA system. It is theoretically proved that the closed-loop system is semi-globally uniformly ultimately bounded. Moreover, the proposed controller can theoretically ensure position tracking with desired accuracy as the bandwidth of extended state observers (ESOs) becomes sufficiently high. Simulation and experimental results verify the effectiveness of the proposed method.

## KEYWORDS

cascade active disturbance rejection control, electrohydrostatic actuator, extended state observer, position tracking

## 1 | INTRODUCTION

A typical electrohydrostatic actuator (EHA) is a pump-controlled variable power transmission system. EHA systems are superior to traditional hydraulic transmissions because they afford higher power density and efficiency in addition to faster responses. EHAs have been successfully implemented in aircrafts and robots to improve the system performance [1–3]; they are now gradually being applied to large construction machinery. However, EHAs suffer from external load disturbances and internal

uncertainties (e.g., parametric uncertainties, unmodeled dynamics, etc.) that affect their precision and stability.

To reduce the adverse effects of system parametric uncertainty and to improve the tracking performance of EHAs, many researchers have developed linear and nonlinear control methods for the position, velocity, and force of EHAs. The investigated strategies include variable structure sliding mode control strategies [4–11], feedback linearization methods [12, 13], backstepping controller based on Lyapunov methods [14, 15], nonlinear adaptive control methods [16, 17], robust control methods [18–20],

and active-disturbance-rejection-based methods. A nonlinear adaptive controller has negligible effect on the uncertain nonlinearity; this hinders the development of high-performance tracking controllers [21].

Active-disturbance-rejection-based methods can estimate and compensate for the total disturbance and mainly include DOBC [22], active disturbance rejection control (ADRC) [23], and uncertainty and disturbance-estimator-based control [24]. Some researchers have developed disturbance-observer-based control (DOBC) to estimate the mechanical and hydraulic disturbances of electrohydraulic systems [25, 26]. However, DOBC methods require full state information. ADRC requires minimal information regarding the system model rather than a precise mathematical model and treats the unknown dynamics and disturbances in the physical process as total disturbance, an extended state observer (ESO) is constructed to estimate the disturbances in real time, and then compensation is applied to the control signal to eliminate the effect of disturbances. Engineering applications in various industrial systems illustrate the superiority of ADRC [21, 27–34]. In recent years, studies have clarified the theoretical basis of ADRC [35]. A uniform asymptotic solution was obtained, and the exponential stability of ADRC based on singular perturbation analysis has been presented in [36]. Several modified ADRCs for nonlinear time delay systems have been studied and comprehensively compared through theoretical analysis in [37]. An innovative ADRC with control input composed of compensation has been proposed in [38], and its effectiveness has been verified through experiments with a manipulator system.

The applications of ADRC in electrohydraulic servo control systems have gradually increased. An active disturbance rejection adaptive control method was developed for motion control of hydraulic servo systems [21]. The unique features of the proposed controller were that both matched and unmatched uncertainties were estimated by two linear ESOs, and the parametric uncertainties were reduced by parameter adaptation to reduce the burden of ESOs and to avoid high gain feedback. However, this method required the full state information. In practical applications, only some states of special concern are measured in actual hydraulic servo systems, such as the position and pressure signals of the actuator. Therefore, it is necessary to further study the methods to exploit ADRC in the output feedback control of EHA systems with uncertain nonlinearities. In engineering applications, the higher order of the observer is, the more sensitive to noise will be. To overcome this limitations of high-order observers, several studies have utilized the pressure dynamics of the actuator and have proposed various cascade controllers, as in [39–43]. In [41], a sliding

mode-based cascade control method with a position outer-loop and pressure inner-loop was proposed for a 6-DOF parallel robot manipulator driven by a valve-controlled asymmetric hydraulic cylinder. In [42], a four-loop nonlinear cascade controller based on an active disturbance compensation method for pump-controlled symmetrical EHA system was proposed. However, this method has many parameters to be tuned, which hinders its application in engineering.

The focus of this paper is to propose a solution that not only can make full use of the advantages of the existing control method and the known information of the EHA system but also facilitate simple parameter tuning and can therefore be practically applied in engineering. A cascade ADRC (C-ADRC) method inspired by the linear active disturbance rejection control (LADRC) and cascade control [39–41] was proposed to control a single-rod EHA. The C-ADRC comprises two cascade linear active disturbance rejection controllers (LADRC), and the uncertain disturbance of each channel can be estimated and compensated in each control channel, which effectively reduces the feedback gain. The inner-loop control gain is obtained by using the model information. The theoretical analysis shows that the overall system is semi-globally uniformly ultimately bounded. Moreover, the proposed controller can theoretically ensure the position tracking error with desired accuracy as the bandwidth of ESOs becomes sufficiently high. The simulation and experimental results show that the proposed method has excellent estimation and tracking precision, strong robustness to system uncertainty. The main contributions of this paper are summarized as follows:

1. By transforming the studied EHA system into a cascade connection of a first-order pressure system and a second-order position system, a C-ADRC method is proposed based on the model information. This method can make full use of the measurable states and known model information of the EHA system.
2. The semi-global uniform ultimate boundedness of the closed-loop is rigorous proved. It illustrates that the proposed controller can theoretically ensure desired accuracy in position tracking as the bandwidth of ESOs becomes sufficiently high. The novelty of this study lies not only in analyzing the stability of the proposed method but also in theoretically providing the parameters tuning method of the controller in engineering applications.

The remainder of this paper is organized as follows. Section 2 introduces the nonlinear mathematical model of the EHA hydraulic system. Section 3 describes the C-ADRC method and its theoretical analysis. Section 4



$$Q_1 + q_1(t) = A_1 \dot{x}_t + ((V_{10} + V_{\text{pipe1}} + A_1 x_t)/\beta_e) \cdot \dot{p}_1 + C_{\text{ip}}(p_1 - p_2), \quad (2)$$

$$Q_2 + q_2(t) = A_2 \dot{x}_t - ((V_{20} + V_{\text{pipe2}} - A_2 x_t)/\beta_e) \cdot \dot{p}_2 + C_{\text{ip}}(p_1 - p_2), \quad (3)$$

where  $Q_1$  and  $Q_2$  denote the flow rates in the actuator,  $\beta_e$  is the effective volume elastic modulus of the hydraulic oil,  $C_{\text{ip}}$  is the internal leakage coefficient of the hydraulic cylinder,  $V_{10}$  and  $V_{20}$  represent the initial volumes of the two chambers of the actuator,  $V_{\text{pipe}}$  is the volume of each of the two connecting pipes, and  $q_1(t)$  and  $q_2(t)$  represent the modeling errors in the dynamics of  $p_1$  and  $p_2$ , respectively.

Compared with the mechanical and hydraulic subsystem, a high-response AC servo motor responds faster, with lower inertia and nonlinearity. Thus, the servo motor dynamics is neglected. Therefore, we assume the input signal  $u$  to be proportional to the pump output speed. Accordingly,  $Q_1$  and  $Q_2$  can be expressed as

$$Q_1 = (A_1/A_2) Q_2 = D_p k_m u, \quad (4)$$

where  $k_m$  is the gain with respect to the control input and  $D_p$  is the pump displacement.

The EHA system dynamic can be described as

$$\begin{cases} \dot{x}_t = x_v, \\ \dot{x}_v = -\frac{kt}{m}x_t - \frac{B_p}{m}x_v - \frac{F(x,t)}{m} + \frac{1}{m}(A_1 p_1 - A_2 p_2), \\ \dot{p}_1 = \frac{\beta_e}{V_{10} + V_{\text{pipe}} + A_1 x_t}(-A_1 \dot{x}_t + Q_1 + d_1), \\ \dot{p}_2 = \frac{\beta_e}{V_{20} + V_{\text{pipe}} - A_2 x_t}(A_2 \dot{x}_t - Q_2 - d_2). \end{cases} \quad (5)$$

where  $d_1 = q_1(t) - c_{\text{ip}}(p_1 - p_2)$ ,  $d_2 = q_2(t) - c_{\text{ip}}(p_1 - p_2)$ , and  $x_v$  is the velocity of the piston.

The state variables are defined as  $x = [x_1, x_2, x_3]^T = [x_t, \dot{x}_t, A_1 p_1 - A_2 p_2]^T$ , and the state-space form equation of the EHA system can be expressed as

$$\begin{cases} \dot{x}_1 = x_2, \\ \dot{x}_2 = f_s(x_1) + f_d(x, t) + b_x x_{3d}, \\ \dot{x}_3 = -\left(\frac{A_1^2 \beta_e}{V_1} + \frac{A_2^2 \beta_e}{V_2}\right) \dot{x}_1 + \left(\frac{A_1 \beta_e}{V_1} d_1 + \frac{A_2 \beta_e}{V_2} d_2\right) \\ + \left(\frac{A_1 \beta_e D_p k_m}{V_1} + \frac{A_2 A_2 \beta_e D_p k_m}{A_1 V_2}\right) u \\ = \sigma(x) + b_x u, \\ y = x_1. \end{cases} \quad (6)$$

where  $y$  is measurable output,  $f_s(x_1) = -\frac{k_t}{m}x_1$ ,  $f_d(x, t) = -(B_p/m)x_2 - F(x, t)/m$ ,  $\sigma(x) = -\left(\frac{A_1^2 \beta_e}{V_1} + \frac{A_2^2 \beta_e}{V_2}\right) \dot{x}_1 + \left(\frac{A_1 \beta_e}{V_1} d_1 + \frac{A_2 \beta_e}{V_2} d_2\right)$ ,  $V_1 = V_{10} + V_{\text{pipe1}} + A_1 x_1$ , and  $V_2 = V_{20} + V_{\text{pipe2}} - A_2 x_1$ .  $b_x = \left(\frac{A_1 \beta_e D_p k_m}{V_1} + \frac{A_2 A_2 \beta_e D_p k_m}{A_1 V_2}\right)$  is used in the simulation and experiment. Further,  $x_1$  is the position of the piston,  $x_2$  is the velocity of the piston, and  $x_3$  is the load force of the hydraulic cylinder.

### 3 | C-ADRC DESIGN

#### 3.1 | Issues to be addressed

The hydraulic system is subjected to parametric uncertainties owing to variations in physical parameters. For designing observers and controllers, the nominal values of the physical parameters (i.e.,  $\beta_e$ ,  $B_p$ , and  $C_{\text{ip}}$ ) are utilized, and the parameter deviations are lumped to the total disturbance terms, namely,  $f_d(x, t)$  in the third line and  $\sigma(x)$  in the sixth line of Equation (6). The control goal is to design the control input  $u$  to make the measurable output  $y$  track a desired input trajectory as closely as possible during the EHA operation. The observer and controller are designed under the following assumptions:

**Assumption 1.** The desired tracking position, velocity, and acceleration are all bounded, and  $p_1$  and  $p_2$  are both physically bounded by the pump outlet and inlet pressure. The functions  $f_s(x_1)$ ,  $f_d(x, t)$  and  $\sigma(x)$  in Equation (6) are locally Lipschitz in a compact subset for all  $x \in \mathbb{R}^3$  and all  $t \in \mathbb{R}^+$ .

**Remark 1.** In the actual EHA systems, the initial values of all states remain in a compact subset.

**Assumption 2.** The functions  $f_d(x, t)$ ,  $\sigma(x)$  and their time derivatives are all bounded for all  $x \in \mathbb{R}^3$  and all  $t \in \mathbb{R}^+$ .

#### 3.2 | ESO design

Based on the system model in Equation (6), we constructed two state observers under the assumption that the output displacement and the pressures,  $p_1$  and  $p_2$ , of the actuator are measurable.  $f_s(x_1)$  can be treated as

known dynamic variables,  $f_d(x, t)$  and  $\sigma(x)$  are unmatched and matched unknown uncertainty, respectively. Thus, we extended unmatched and matched uncertainty as states  $x_{ed1}$  and  $x_{ed2}$ . Let  $h_1$  and  $h_2$  be unknown bounded functions, the time derivatives of  $x_{ed1}$  and  $x_{ed2}$  are  $h_1$  and  $h_2$ , respectively. Therefore, the two ESOs can be constructed as follows:

$$\begin{cases} \dot{\hat{x}}_1 = \hat{x}_2 + l_1(x_1 - \hat{x}_1), \\ \dot{\hat{x}}_2 = f_s(\hat{x}_1) + \hat{x}_{ed1} + b_*\hat{x}_3 + l_2(x_1 - \hat{x}_1), \\ \dot{\hat{x}}_{ed1} = l_3(x_1 - \hat{x}_1). \end{cases} \quad (7)$$

$$\begin{cases} \dot{\hat{x}}_3 = \hat{x}_{ed2} + b_x u + l_4(x_3 - \hat{x}_3), \\ \dot{\hat{x}}_{ed2} = l_5(x_3 - \hat{x}_3). \end{cases} \quad (8)$$

where  $\hat{x} = [\hat{x}_1, \hat{x}_2, \hat{x}_{ed1}, \hat{x}_3, \hat{x}_{ed2}]^T \in \mathbb{R}^5$  is the estimation of  $x$  and  $l_i, i = 1, 2, 3, 4, 5$  are the observer gains. By referring to [44], let  $[l_1, l_2, l_3, l_4, l_5] = [\omega_{01}\alpha_1, \omega_{01}^2\alpha_2, \omega_{01}^3\alpha_3, \omega_{02}\alpha_4, \omega_{02}^2\alpha_5]$  with  $\omega_{01}, \omega_{02} > 0$ , and  $\omega_{01}$  and  $\omega_{02}$  are the bandwidths of the two observers.

*Remark 2.* In this study, in contrast to the existing studies, the load force ( $A_1p_1 - A_2p_2$ ) of single-rod EHA is directly defined as a state variable to fully utilize the known model information of the EHA system and to ensure a more intuitive observer design process.

Let  $\chi = [\chi_1, \chi_2, \chi_3]^T = (x - \hat{x})/\omega_{01}^{i-1}, j = 1, 2, ed1, i = 1, 2, 3$ ,  $\gamma = [\gamma_1, \gamma_2]^T = (x - \hat{x})/\omega_{02}^{i-1}$ , and  $i = 1, 2, j = 3, ed2$ . Then, we have

$$\begin{cases} \dot{\chi} = \omega_{01}A_1\chi + B_1\Delta_1, \\ \dot{\gamma} = \omega_{02}A_2\gamma + B_2\Delta_2. \end{cases} \quad (9)$$

$$\text{where } A_1 = \begin{bmatrix} -\alpha_1 & 1 & 0 \\ -\alpha_2 & 0 & 1 \\ -\alpha_3 & 0 & 0 \end{bmatrix}, A_2 = \begin{bmatrix} -\alpha_4 & 1 \\ -\alpha_5 & 0 \end{bmatrix}, B_1 = [0, 0, 1]^T,$$

$$B_2 = [1, 1]^T, \Delta_1 = [0, \Delta f_s, h_1/\omega_{01}^2], \text{ and } \Delta_2 = [0, h_2/\omega_{02}].$$

The estimation error is defined as  $\eta = [\eta_1, \eta_2, \eta_{ed1}, \eta_3, \eta_{ed2}]^T = [\chi, \gamma]^T$ , then

$$\begin{cases} \dot{\eta}_1 = (\dot{x}_1 - \dot{\hat{x}}_1)/\omega_{01}^0 = -l_1\eta_1 + \omega_{01}\eta_2, \\ \dot{\eta}_2 = (\dot{x}_2 - \dot{\hat{x}}_2)/\omega_{01}^1 = (-l_2\eta_1 + b_*\eta_3 + \omega_{01}^2\eta_{ed1} + \Delta f_s)/\omega_{01}, \\ \dot{\eta}_{ed1} = (\dot{x}_{ed1} - \dot{\hat{x}}_{ed1})/\omega_{01}^2 = (-l_3\eta_1 + h_1)/\omega_{01}^2, \\ \dot{\eta}_3 = (\dot{x}_3 - \dot{\hat{x}}_3)/\omega_{02}^0 = -l_4\eta_3 + \omega_{02}\eta_{ed2}, \\ \dot{\eta}_{ed2} = (\dot{x}_{ed2} - \dot{\hat{x}}_{ed2})/\omega_{02}^1 = (-l_5\eta_3 + h_2)\omega_{02}. \end{cases} \quad (10)$$

Let  $\varepsilon = 1/\omega_{01} = 1/\omega_{02}$ , and  $0 < \varepsilon \ll 1$ . Then, the dynamic of the state estimation errors can be given by

$$\varepsilon \dot{\eta} = A_\eta \eta + \varepsilon B \Delta_0, \quad (11)$$

where  $A_\eta = \begin{bmatrix} A_1 & 0 \\ 0 & A_2 \end{bmatrix}$ ,  $B = [B_1, B_2]^T$ , and  $\Delta_0 = [\Delta_1, \Delta_2]^T$ .

### 3.3 | Controller design

The desired track state vector is defined as  $r = [r_1, r_2, r_3]^T$ . By combining the unknown total disturbances estimation obtained from the designed ESOs, the virtual control law  $x_3$  is designed as

$$x_{3d} = \frac{1}{b_*} \left[ k_1(r_1 - \hat{x}_1) + k_2(r_2 - \hat{x}_2) - \hat{x}_{ed1} - \hat{f}_s + r_3 \right], \quad (12)$$

and the actual control input can be designed as

$$u = M \text{sat} \left\{ \frac{1}{M} \left\{ \frac{1}{b_x} [k_3(x_{3d} - \hat{x}_3) - \hat{x}_{ed2}] \right\} \right\}. \quad (13)$$

where  $M$  is the saturation bound of the control input  $u$ . The standard saturation function is defined as  $\text{sat}(\vartheta) = \min\{1, |\vartheta|\} \text{sign}(\vartheta)$ , which is used to protect the system from peaking in the observer's transient response.

Substituting Equation (12) into Equation (13) gives

$$\begin{aligned} u = M \text{sat} \left\{ \frac{1}{M b_x} \left\{ \frac{k_3}{b_*} [k_1(r_1 - x_1 + \hat{e}_1) \right. \right. \\ \left. \left. + k_2(r_2 - x_2 + \hat{e}_2)] + k_3(e_3 + e_3) \right\} \right. \\ \left. + \frac{1}{M b_x} \left[ \frac{k_3}{b_*} (-\hat{x}_{ed1} - \hat{f}_s + r_3) - k_3 x_{3d} \right. \right. \\ \left. \left. - \hat{x}_{ed2} \right] \right\}. \end{aligned} \quad (14)$$

where  $b_x > 0$ ,  $b_* > 0$ , and  $k_i > 0, i = 1, 2, 3$ .  $k_i$  is selected as the coefficient of the Hurwitz characteristic polynomial  $s^n + k_n s^{n-1} + \dots + k_1$ . For simplicity, let  $s^n + k_n s^{n-1} + \dots + k_1 = (s + \omega_c)^n$  with  $\omega_c > 0$ . Further,  $k_i = \frac{n!}{(i-1)!(n+1-i)!} \omega_{c1}^{(n+1-i)}, i = 1, 2$ , and let  $k_3 = \omega_{c2}$ , where  $\omega_{c1}$  and  $\omega_{c2}$  are the bandwidths of the controllers of the outer and inner loops, respectively. In engineering applications, to realize a satisfactory tracking performance,  $\omega_{c2}$  should be significantly greater than  $\omega_{c1}$ .

The tracking error vector is defined as  $e_i = r_i - x_i, i = 1, 2; e_j = x_{3d} - x_3, j = 3$ . Therefore, the tracking error dynamics of Equation (6) is

$$\dot{e} = A_e e + B_e \Lambda_e \eta + B_f \Delta_3. \quad (15)$$

where  $A_e = \begin{bmatrix} 0 & 1 & 0 \\ -k_1 & -k_2 & 0 \\ -k_1 k_3 / b_* & -k_2 k_3 / b_* & -k_3 \end{bmatrix}$  is the Hurwitz matrix,

$$B_e = \begin{bmatrix} 0 & 0 & 0 & 0 & 0 \\ -k_1 & -k_2 & -1 & 0 & 0 \\ -k_1 k_3 / b_* & -k_2 k_3 / b_* & 0 & -k_3 & -1 \end{bmatrix},$$

$$\Lambda_e = \begin{bmatrix} 1 & 0 & 0 & 0 & 0 \\ 0 & \omega_{o1}^1 & 0 & 0 & 0 \\ 0 & 0 & \omega_{o1}^2 & 0 & 0 \\ 0 & 0 & 0 & 1 & 0 \\ 0 & 0 & 0 & 0 & \omega_{o2}^1 \end{bmatrix}, B_f = [0 \ 1 \ 1]^T, \quad \text{and}$$

$$\Delta_3 = \begin{bmatrix} 0, & -\Delta f_s, & \frac{k_3}{b_*} (\hat{x}_{ed1} + \hat{f}_s - r_3) + \dot{x}_{3d} + k_3 x_{3d} \end{bmatrix}.$$

Upon combining the observer error dynamics with Equation (11), the error dynamics of the closed-loop EHA system can be expressed as

$$\dot{e} = A_e e + B_e \Lambda_e \eta + B_f \Delta_3, e(0) = e_0, \quad (16)$$

$$\varepsilon \dot{\eta} = A_\eta \eta + \varepsilon B \Delta_0, \eta(0) = \eta_0. \quad (17)$$

*Remark 3.* The procedure for choosing parameters of the proposed controller is provided as follows.

1. The saturation bound  $M$  in (12) is chosen such that the saturation is not activated under the state feedback.
2. For the designed ESOs in (7) and (8), a general method to choose parameters  $\alpha_i, i=1,2,3$  is  $\alpha_i = \frac{(3+1)!}{(3+1-i)!i!}$ , and  $\alpha_i, i=4,5$  is  $\alpha_i = \frac{(2+1)!}{[(2+1-(i-3))!i(i-3)]!}$ . Let  $\omega_{o1} = \omega_{o2}$ , and  $\varepsilon = 1/\omega_{o1} = 1/\omega_{o2}$  is chosen to guarantee the stability and performance requirements of the closed-loop system.
3. For the designed control law in (14), let  $\omega_{c1} = \omega_{o1}/(3-5)$  and  $\omega_{c2} = \omega_{o2}/(2-3)$ .
4. In practice, we may need to retune the parameters  $\varepsilon$  and  $\omega_c$  based on the well-tuned parameters in simulations.

### 3.4 | Main results

Assume that the initial states of the closed-loop system (Equations (16) and (17)) are  $e_0 \in S$  and  $\eta_0 \in Q$ , where

$S$  and  $Q$  are both a compact set in  $\mathbb{R}^3$  and  $\mathbb{R}^5$ , respectively. The closed-loop system (Equations (16) and (17)) is a standard singularly perturbed system [45]. When  $\varepsilon \rightarrow 0$ , the boundary layer system can be expressed as

$$\varepsilon \dot{\eta} = A_\eta \eta. \quad (18)$$

Because  $A_\eta$  is a Hurwitz matrix, a unique positive definite symmetric matrix  $P_{\eta 1} > 0$  exists such that  $A_\eta^T P_{\eta 1} + P_{\eta 1} A_\eta = -I$ . We choose the Lyapunov function as  $W(\eta) = \eta^T P_{\eta 1} \eta$ . For the boundary layer system in Equation (18), the time derivative of  $W(\eta)$  is

$$\dot{W}(\eta) = -\|\eta\|^2 / \varepsilon \leq 0. \quad (19)$$

According to the definition of Lyapunov stability, the boundary layer system in Equation (18) is asymptotically stable,  $\eta \rightarrow 0$ , and  $t \rightarrow \infty$ . Let  $\eta = 0$ , then the tracking error  $e$  can degenerate into

$$\dot{e} = A_e e + B_f \Delta_3. \quad (20)$$

Because  $A_e$  is a Hurwitz matrix, a unique positive definite symmetric matrix  $P_{e1} > 0$  exists such that  $A_e^T P_{e1} + P_{e1} A_e = -I$ . A Lyapunov candidate function  $V(e)$  is defined as  $V(e) = e^T P_{e1} e$ . For the degenerate system in Equation (20), the time derivative of  $V(e)$  is

$$\begin{aligned} \dot{V}(e) = & -\|e\|^2 + 2e^T P_{e1} B_f \Delta_3 \leq \\ & -\|e\|(\|e\| - 2\lambda_{\max}(P_{e1}) B_f \Delta_3). \end{aligned} \quad (21)$$

By referring to Assumption 1, the system dynamics  $f_s(x_1)$ ,  $f_d(x, t)$ , and  $\sigma(x)$  are local Lipschitz functions with respect to  $x$ . There exists  $\psi > 0$  and  $\phi > 1$  such that  $|\Delta_3| \leq (\phi - \varepsilon)\psi$ . Therefore, Equation (21) can be rewritten as

$$\begin{aligned} \dot{V}(e) = & -\|e\|^2 + 2e^T P_{e1} B_f \Delta_3 \leq \\ & -\|e\|(\|e\| - 2\lambda_{\max}(P_{e1})(\phi - \varepsilon)\psi). \end{aligned} \quad (22)$$

If  $\|e\| \geq 2\lambda_{\max}(P_{e1})(\phi - \varepsilon)\psi$ , then we have  $\dot{V}(e) \leq 0$ . According to the definition of Lyapunov stability, the degenerate system in Equation (20) is asymptotically stable, and  $e$  and  $\eta$  asymptotically converge to 0 as  $t \rightarrow \infty$ .

**Theorem 1.** *If Assumptions 1–2 hold, then*

1. there exists  $\varepsilon^* > 0$  such that for any  $0 < \varepsilon < \varepsilon^*$ , the trajectories  $(e(t), \eta(t))$  of systems (16) and (17) starting from the compact set  $S \times Q$  are bounded for any  $t > 0$ , and



2. there exists  $\varepsilon_1^* = \varepsilon_1^*(\xi_1) > 0$  and  $T_1 = T_1(\xi_1)$  for any  $\xi_1 > 0$  such that

$$\|e(t)\| + \|\eta(t)\| \leq \xi_1, \quad \forall t \geq T_1, \quad (23)$$

for any  $0 < \varepsilon < \varepsilon_1^*$ .

**Proof of Theorem 1.** The proof consists of three steps. The first step is to prove the positive definite invariance of an appropriately selected set  $\Lambda$  that can be arbitrarily small in the direction of the error variable. The second step is to prove that any state trajectory of the closed-loop system (Equations (16) and (17)) starting from the compact set  $S \times Q$  will enter the invariant set within a finite time. The third step is to prove that the state trajectory  $(e(t), \eta(t))$  can approach the state origin with arbitrary precision.

**Step 1:** By referring to Assumption 1, for any  $(e(t), \eta(t)) \in S \times Q$ , the system dynamics  $f_s(x_1)$ ,  $f_d(x, t)$ , and  $\sigma(x)$  are local Lipschitz functions with respect to  $x$ . Combined with the continuous differentiability of the control input  $u$ , there exist  $L_1, L_2, L_3, L_4 > 0$  such that

$$\|B_e \Lambda_e \eta\| \leq L_1 \|\eta\|, \quad (24)$$

$$|\Delta_1| \leq \varepsilon L_2 \|\eta\| \text{ and } |\Delta_2| \leq L_3 + \varepsilon L_4 \|\eta\|, \quad (25)$$

Assume that  $\Lambda = \{V(e) \leq c\} \times \{W(\eta) \leq \rho \varepsilon^2\}$ , where  $c \geq \lambda_{\max}(P_{e1}) \|e_0\|^2$ .

**Lemma 1.** Assuming that there exist  $\varepsilon_1 \geq 0$  and a constant  $\rho$  that depends on  $\varepsilon_1$ , the compact set  $\Lambda$  is positive definite invariant for any  $\varepsilon \in (0, \varepsilon_1]$ .

**Proof.** For the tracking error  $e$  of the subsystem in Equation (16), we have

$$\begin{aligned} \dot{V}(e) &= -\|e\|^2 + 2e^T P_{e1} B_e \Lambda_e \eta + 2e^T P_{e1} B_f \Delta_3 \\ &\leq -\|e\|(\|e\| - 2\lambda_{\max}(P_{e1})(L_1 \|\eta\| + (\phi - \varepsilon)\psi)). \end{aligned} \quad (26)$$

To make  $\dot{V}(e) \leq 0$  hold for any  $(e(t), \eta(t)) \in \{V(e) = c\} \times \{W(\eta) \leq \rho \varepsilon^2\}$ ,

$$\|e\| \geq 2\lambda_{\max}(P_{e1})(L_1 \|\eta\| + (\phi - \varepsilon)\psi). \quad (27)$$

is necessary.

Additionally,

$$\lambda_{\min}(P_{e1}) \|e\|^2 \leq V(e) \leq \lambda_{\max}(P_{e1}) \|e\|^2, \text{ and} \quad (28)$$

$$\lambda_{\min}(P_{\eta1}) \|\eta\|^2 \leq W(\eta) \leq \lambda_{\max}(P_{\eta1}) \|\eta\|^2. \quad (29)$$

To hold Equation (27), we obtain

$$\begin{aligned} \sqrt{\frac{c}{\lambda_{\max}(P_{e1})}} &\geq 2\lambda_{\max}(P_{e1}) \left( L_1 \sqrt{\frac{\rho \varepsilon^2}{\lambda_{\min}(P_{\eta1})}} + (\phi - \varepsilon)\psi \right), \\ \Rightarrow \rho &\leq \frac{\lambda_{\min}(P_{\eta1})}{\varepsilon^2 L_1^2} \left[ \frac{\sqrt{c/\lambda_{\max}(P_{e1})}}{2\lambda_{\max}(P_{e1})} - (\phi - \varepsilon)\psi \right]^2, \end{aligned} \quad (30)$$

From Equation (30), Equation (27) holds if

$$\rho = \frac{\lambda_{\min}(P_{\eta1})}{\varepsilon^2 L_1^2} \left[ \frac{\sqrt{c/\lambda_{\max}(P_{e1})}}{2\lambda_{\max}(P_{e1})} - (\phi - \varepsilon)\psi \right]^2. \quad (31)$$

**Remark 4.** From Equation (30),  $\rho$  can be appropriately large for a constant  $c > 0$  when  $\varepsilon$  is very small.

For the subsystem in Equation (17), the time derivative of  $W(\eta)$  is

$$\begin{aligned} \dot{W}(\eta) &= -\frac{\|\eta\|^2}{\varepsilon} + 2\eta^T P_{\eta1} (B_1 \Delta_1 + B_2 \Delta_2) \\ &\leq -\frac{\|\eta\|^2}{\varepsilon} + 2\varepsilon \lambda_{\max}(P_{\eta1}) (L_2 + L_4) \|\eta\|^2 \\ &\quad + 2L_3 \lambda_{\max}(P_{\eta1}) \\ &\leq -\frac{\|\eta\|^2}{2\varepsilon} - \|\eta\| \left( \frac{1 - 4\varepsilon \lambda_{\max}(P_{\eta1}) (L_2 + L_4)}{2\varepsilon} \|\eta\| \right. \\ &\quad \left. - 2\lambda_{\max}(P_{\eta1}) L_3 \right). \end{aligned} \quad (32)$$

For any  $(e(t), \eta(t)) \in \{V(e) \leq c\} \times \{W(\eta) = \rho \varepsilon^2\}$ , if  $\dot{W}(\eta) \leq 0$ , then we have

$$\varepsilon < 1/[4\lambda_{\max}(P_{\eta1})(L_2 + L_4)], \quad (33)$$

$$\|\eta\| \geq \frac{4\varepsilon \lambda_{\max}(P_{\eta1}) L_3}{1 - 4\varepsilon \lambda_{\max}(P_{\eta1}) (L_2 + L_4)}. \quad (34)$$

Based on Equations (28) and (29), Equation (34) holds if

$$\sqrt{c\lambda_{\min}(P_{\eta 1})} \geq \left( \frac{8\varepsilon \sqrt{\lambda_{\max}^3(P_{\eta 1})\lambda_{\max}^3(P_{e1})\lambda_{\max}(P_{e1})L_1L_3}}{1 - 4\varepsilon\lambda_{\max}(P_{\eta 1})(L_2 + L_4)} + 2\sqrt{\lambda_{\max}^3(P_{e1})(\phi - \varepsilon)\psi} \right). \quad (35)$$

Assuming that  $\varepsilon_2 = \frac{1}{4\lambda_{\max}(P_{\eta 1})(L_2 + L_4)}$ ,

$$f(\varepsilon) = \frac{8\varepsilon \sqrt{\lambda_{\max}^3(P_{\eta 1})\lambda_{\max}^3(P_{e1})\lambda_{\max}(P_{e1})L_1L_3}}{1 - 4\varepsilon\lambda_{\max}(P_{\eta 1})(L_2 + L_4)} + 2\sqrt{\lambda_{\max}^3(P_{e1})(\phi - \varepsilon)\psi}.$$

In  $\varepsilon_1 \in (0, \varepsilon_2)$ ,  $f(\varepsilon)$  increases monotonically, such that  $\lim_{\varepsilon \rightarrow 0} f(\varepsilon) = 0$  and  $\lim_{\varepsilon \rightarrow \varepsilon_2} f(\varepsilon) = \infty$ . Therefore, there must exist  $\varepsilon_3 \in (0, \varepsilon_2)$  such that

$$f(\varepsilon_3) = \sqrt{c\lambda_{\min}(P_{\eta 1})}. \quad (36)$$

Therefore, Equation (35) holds for any  $\varepsilon \in (0, \varepsilon_3)$ , that is,  $\dot{W}(\eta) \leq 0$  holds. Combining Equations (31) and (36) proves Lemma 1.

**Remark 5.** According to Equation (36), the smaller the obtained  $c$  value, the smaller is the  $\varepsilon_3$  value. In other words, the parameters  $\varepsilon$  of the ESO must be smaller if the output feedback control accuracy requirement is higher.

**Step 2:** In this case, considering  $e_0 \in S, \eta_0 \notin \{W(\eta) \leq \rho\varepsilon^2\}$ . Because  $e_0$  is the interior point of  $S$ , from Equations (28) and (29),  $\gamma_e = \max_{e \in \partial S, \eta \in \partial Q} \{\|e\| + L_1\|\eta\| + (\phi - \varepsilon)\psi\}$  satisfies

$$\|e(t) - e(0)\| \leq \gamma_e t \text{ and } e(t) \in S. \quad (37)$$

Thus, there is a finite time  $T_0$  that satisfies  $e(t) \in S$  for any  $t \in [0, T_0]$ . In  $t \in [0, T_0]$ , the time derivative of  $W(\eta)$  is

$$\dot{W}(\eta) \leq -\|\eta\|^2/2\varepsilon \text{ and } W(0) > \rho\varepsilon^2. \quad (38)$$

Further, from Equation (29), we obtain

$$\begin{aligned} \frac{dW}{dt} &\leq -\frac{1}{2\varepsilon\lambda_{\max}(P_{\eta 1})}W, \Rightarrow W(t) \\ &\leq W(0)\exp\left(-\frac{1}{2\varepsilon\lambda_{\max}(P_{\eta 1})}t\right), \end{aligned} \quad (39)$$

Then, we can estimate the time  $T$  at which  $W(t)$  enters  $\{W(\eta) \leq \rho\varepsilon^2\}$  as

$$\begin{aligned} W(0)\exp\left(-\frac{1}{2\varepsilon\lambda_{\max}(P_{\eta 1})}T\right) &= \rho\varepsilon^2, \Rightarrow T(\varepsilon) \\ &= 2\varepsilon\lambda_{\max}(P_{\eta 1})\ln\left(\frac{W(0)}{\rho\varepsilon^2}\right). \end{aligned} \quad (40)$$

Based on L'Hôpital's Rule, we obtain  $\lim_{\varepsilon \rightarrow 0} T(\varepsilon) = 0$ . Thus, there exists  $\varepsilon_4 > 0$  such that  $T(\varepsilon) < T_0$  for any  $\varepsilon \in (0, \varepsilon_4)$ .

Upon combining steps 1 and 2 of the certification process, if we let  $\varepsilon^* = \min\{\varepsilon_1, \varepsilon_4\}$ , then for any  $\varepsilon \in (0, \varepsilon^*)$ , the trajectory  $(e(t), \eta(t))$  starting from  $S \times Q$  will enter the positive definite invariant set  $\Lambda$  within a finite time  $T$ . In other words, the trajectory  $(e(t), \eta(t))$  is bounded for any  $t > 0$ . Thus, the first conclusion of Theorem 1 is proved.

**Step 3:** Construct the constant  $\varphi_1 = \delta_1/(4\lambda_{\max}(P_{e1})L_1 + 1)$  that holds for any  $\delta_1 > 0$ .

To ensure that any  $\eta$  belonging to the set  $\{W(\eta) \leq \rho\varepsilon^2\}$  satisfies  $\|\eta\| \leq \varphi_1$ , from Equation (29), we obtain

$$\begin{aligned} \sqrt{\frac{\rho\varepsilon^2}{\lambda_{\min}(P_{\eta 1})}} &\leq \varphi_1, \Rightarrow \varepsilon \\ &\leq \frac{1}{\psi} \left( L_2\varphi_1 + \phi - \frac{\sqrt{c/\lambda_{\max}(P_{e1})}}{2\lambda_{\max}(P_{e1})} \right) \\ &\triangleq \varepsilon_5. \end{aligned} \quad (41)$$

According to step 2, let  $\varepsilon_1^* = \min\{\varepsilon_1, \varepsilon_5\}$ . Then, the trajectory  $(e(t), \eta(t))$  starting from  $S \times Q$  enters the positive definite invariant set  $\Lambda$  within a finite time  $T(\varepsilon_1^*)$ . The time derivative of  $V(e)$  is

$$\begin{aligned} \dot{V}(e) &= -\|e\|^2 + 2e^T P_{e1} B_e \Lambda_e \eta + 2e^T P_{e1} B_f \Delta_3 \\ &\leq -\frac{\|e\|^2}{2} - \|e\| \left( \frac{\|e\|}{2} - 2\lambda_{\max}(P_{e1})(L_1\|\eta\| + (\phi - \varepsilon)\psi) \right). \end{aligned} \quad (42)$$

If  $e(t)$  satisfies  $\|e\| \geq 4\lambda_{\max}(P_{e1})(L_1\|\eta\| + (\phi - \varepsilon)\psi)$ , it can guarantee  $\dot{V}(e) \leq -\|e\|^2/2$ . Assuming that  $\varphi_2 = 4\lambda_{\max}(P_{e1})\varepsilon L_1\varphi_1$ , if  $\|e(T(\varepsilon_1^*))\| \geq \varphi_2$ , we can estimate the time  $T'$  at which  $e(t)$  enters  $\{\|e(t)\| \leq \varphi_2\}$ . From Equation (28), we obtain

$$\begin{aligned} \frac{dV}{dt} &\leq -\frac{1}{2\lambda_{\max}(P_{e1})}V, \Rightarrow V(t) \\ &\leq V(T(\varepsilon_1^*))\exp\left(-\frac{1}{2\lambda_{\max}(P_{e1})}(t - T(\varepsilon_1^*))\right), \end{aligned} \quad (43)$$

and  $T'$  satisfies



$$V(T(\varepsilon_1^*)) \exp\left(-\frac{1}{2\lambda_{\max}(P_{e1})}(T' - T(\varepsilon_1^*))\right) = \lambda_{\min}(P_{e1})\varphi_2^2, V(T(\varepsilon_1^*)) \geq \lambda_{\max}(P_{e1})\varphi_2^2. \quad (44)$$

From Equation (44), we obtain  $T' = T(\varepsilon_1^*) + 2\lambda_{\max}(P_{e1}) \ln(V(T(\varepsilon_1^*)) / \lambda_{\min}(P_{e1})\varphi_2^2)$ . Let  $T_1 = T'$ . By combining Equations (41) and (44), for any  $t > T_1$ , we obtain

$$\|e(t)\| + \|\eta(t)\| \leq \varphi_1 + \varphi_2 = \frac{4\lambda_{\max}(P_{e1})\varepsilon L_1 + 1}{4\lambda_{\max}(P_{e1})L_1 + 1} \delta_1 \leq \delta_1. \quad (45)$$

Thus, the second conclusion of Theorem 1 is correct, Q.E.D.

Figure 3 provides a schematic diagram of the C-ADRC structure.

*Remark 6.* It is theoretically shown that the tracking accuracy of proposed controller is sufficiently high as the bandwidth of the ESO approaches infinity ( $\varepsilon \rightarrow 0$ ). On the other hand, in practice, the bandwidth of ESO should be determined by considering the trade-off between the estimation performance and the limitations (e.g., noise-sensitivity, time-delay, etc.).

## 4 | SIMULATION RESULTS AND DISCUSSION

The mathematical models of the EHA and C-ADRC studied in this paper were established in the MATLAB/

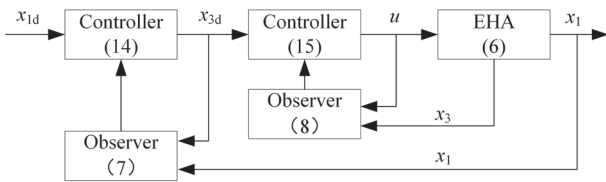

FIGURE 3 Schematic of C-ADRC structure

TABLE 1 Parameters

| Parameter | Value                 | Unit                   | Parameter         | Value               | Unit            |
|-----------|-----------------------|------------------------|-------------------|---------------------|-----------------|
| $k_t$     | 110                   | N·mm <sup>-1</sup>     | $V_{10}$          | $1 \times 10^4$     | mm <sup>3</sup> |
| $B_p$     | 200                   | N·s/m                  | $V_{20}$          | $7.486 \times 10^5$ | mm <sup>3</sup> |
| $m$       | 100                   | kg                     | $V_{\text{pipe}}$ | $1.41 \times 10^4$  | mm <sup>3</sup> |
| $A_1$     | 5024                  | mm <sup>2</sup>        | $\beta_e$         | 1700                | MPa             |
| $A_2$     | 2461.76               | mm <sup>2</sup>        | $D_p$             | 1.25                | ml/r            |
| $C_{ip}$  | $0.26 \times 10^{-8}$ | mm <sup>3</sup> /s/MPa | $k_m$             | 300                 | /               |

Simulink software. In the simulation, the sampling time is set as 0.001 s, and the Euler method is utilized to discretize the continuous closed-loop system. The nominal values of system parameters listed in Table 1 were used. The spring load is considered in all the simulations.

In addition, the performance of the proposed control method is assessed using the following three performance indices, i.e., the maximum, average, and standard deviation of the estimation and tracking errors marked as  $M_e$ ,  $\mu_{av}$ , and  $\sigma_s$ , respectively [10].

### 4.1 | Square-wave input tracking

The dynamic response for a square-wave input with transition process is first analyzed. The constant load force disturbance is set to 5000 N at 8 s to verify the estimation performance and control robustness, and  $\omega_{c2}$  is set to be more than two times  $\omega_{c1}$ . The controller parameters are given as  $b^* = 0.01$ ,  $\omega_{c1} = 20$ ,  $\omega_{c2} = 40$ ,  $\omega_{o1} = 100$ , and  $\omega_{o2} = 100$ . Figure 4 and Table 2 show the estimation performance of the proposed method. It can be seen that the estimated state variables tracked the actual state variables well. The maximum estimation error of  $x_t$  is 0.13239 mm. At 8 s, a small peak appeared in the position tracking owing to external disturbances. However, it quickly returned to the set position. The maximum estimation error of the force reaches 21.9481 N when external disturbances occur. Figure 5 shows the disturbance estimates in the two channels of the C-ADRC controller. This figure shows that the proposed controller can well estimate the disturbance changes in the two control channels.

Figure 6 and Table 3 show the position tracking performance of the C-ADRC controller. They show that the proposed controller achieves good tracking performance and has excellent anti-disturbance ability. Further, Table 3 shows that the maximum tracking error of the displacement and force are 0.50969 mm and 413.2487 N, which are less than the desired value by 5.1% and 7%, respectively. As the spring load weakens the stiffness characteristic of the system, the tracking errors of displacement and load force are large at 8 s. However, when

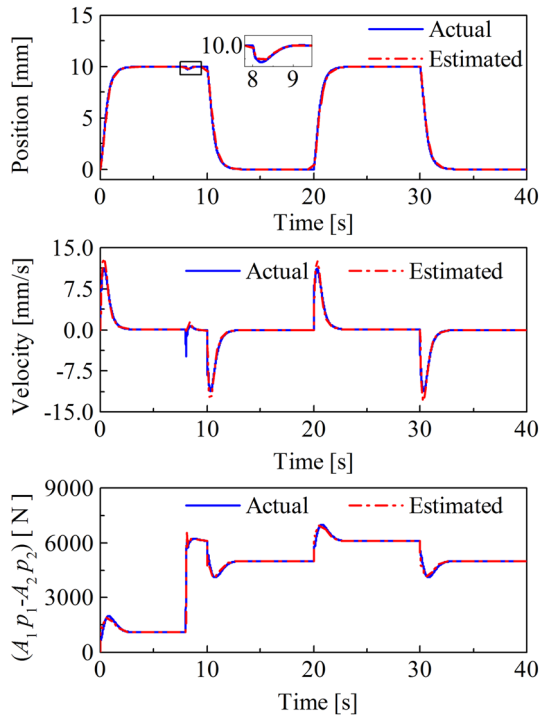

FIGURE 4 Estimation of each state variable [Color figure can be viewed at [wileyonlinelibrary.com](http://wileyonlinelibrary.com)]

TABLE 2 Performance indices of state estimation

| Estimation error | $M_e$   | $\mu_{av}$ | $\sigma_s$ |
|------------------|---------|------------|------------|
| Position         | 0.13239 | 0.00022    | 0.03225    |
| Force            | 21.9481 | 0.01668    | 0.9649     |

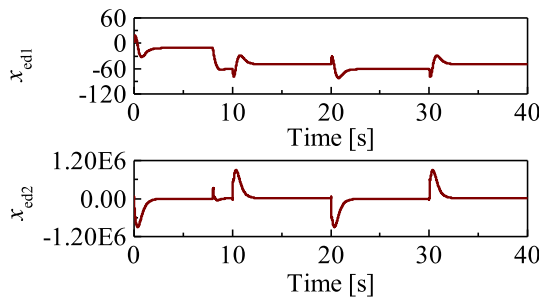

FIGURE 5 Disturbance estimation of C-ADRC controller [Color figure can be viewed at [wileyonlinelibrary.com](http://wileyonlinelibrary.com)]

a large external disturbance is suddenly applied, the instantaneous high-frequency fluctuation is greatly weakened. The control input signal  $u$  increases rapidly when the position signal changes as shown in Figure 6. When an external disturbance occurs at 8 s, the control signal  $u$  is quickly compensated.

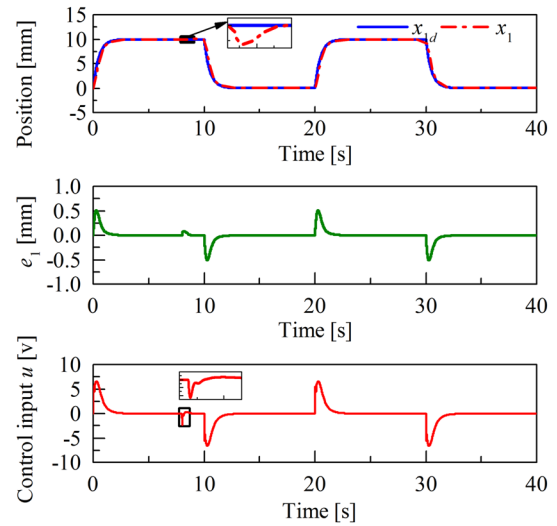

FIGURE 6 Tracking performance and control input [Color figure can be viewed at [wileyonlinelibrary.com](http://wileyonlinelibrary.com)]

TABLE 3 Performance indices of state tracking

| Indices | $M_e$    | $\mu_{av}$ | $\sigma_s$ |
|---------|----------|------------|------------|
| $e_1$   | 0.50969  | 0.00089    | 0.1069     |
| $e_3$   | 413.2487 | 0.02321    | 19.59217   |

In Equation (6), the spring load force  $f_s(x_1)$  is treated as a known disturbance, which is not included in the total disturbance  $x_{ed1}$  of the outer-loop. To analyze the impact of model uncertainty on tracking performance,  $f_s(x_1)$  is classified as the total disturbance and known disturbance, respectively, and the position tracking performances are compared, as shown in Figure 7. As can be observed, when  $f_s(x_1)$  is treated as a known disturbance to be compensated, the position tracking error is slightly smaller. Thus, it is necessary to use as much model information as possible in the ADRC controller design to improving the tracking accuracy.

## 4.2 | Sinusoidal input tracking

To verify the tracking performance of the proposed controller under sinusoidal signals, the reference position  $x_{1d}(t) = 6\sin(0.2t) + 6$  is used, which ensures that  $x_{1d}$  is bounded for Assumption 1. The load force disturbance is also set to 5,000 N at 8 s. The controller parameters are given as  $b^* = 0.01$ ,  $\omega_{c1} = 15$ ,  $\omega_{c2} = 30$ ,  $\omega_{o1} = 60$ , and  $\omega_{o2} = 60$ . Figure 8 and Table 4 show the estimation performance of the proposed controller. Figure 8 shows that the estimated state variables can track the actual state

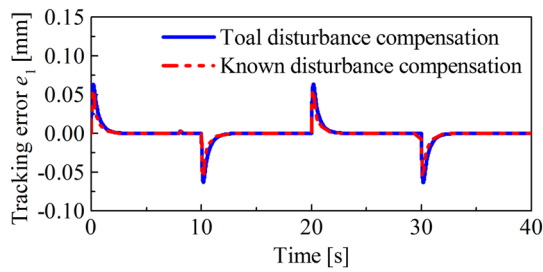

**FIGURE 7** Comparison of position tracking error considering model uncertainty [Color figure can be viewed at [wileyonlinelibrary.com](http://wileyonlinelibrary.com)]

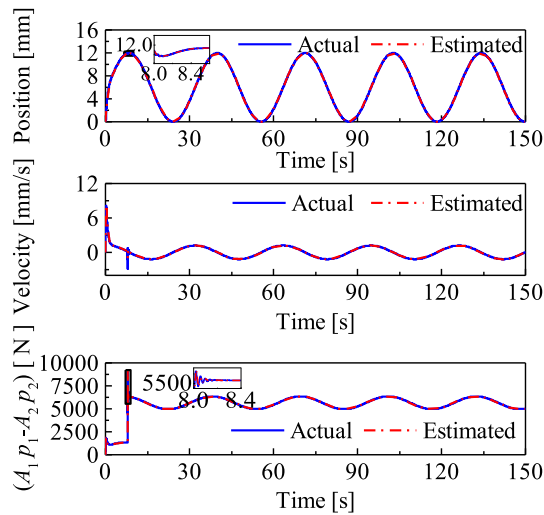

**FIGURE 8** Estimation results of proposed state observer [Color figure can be viewed at [wileyonlinelibrary.com](http://wileyonlinelibrary.com)]

**TABLE 4** Performance indices of state estimation

| Estimation error | $M_e$   | $\mu_{av}$ | $\sigma_s$ |
|------------------|---------|------------|------------|
| Position         | 0.00559 | $1.54E-6$  | $1.32E-4$  |
| Force            | 575.171 | 0.0012     | 10.9258    |

variables well after the disturbance occurs at 8 s. When a disturbance occurs, the actual state change can be well estimated after a certain period. Table 4 shows that the maximum estimation error of the displacement does not exceed 0.05%. Figure 9 shows the estimation of disturbances in the two channels of the C-ADRC controller. As shown, the proposed observer has excellent observation performance.

Figure 10 and Table 5 show that the proposed method has good dynamic tracking performance. When a disturbance occurs at 8 s, the displacement fluctuation is negligible, and the tracking error fluctuates but quickly

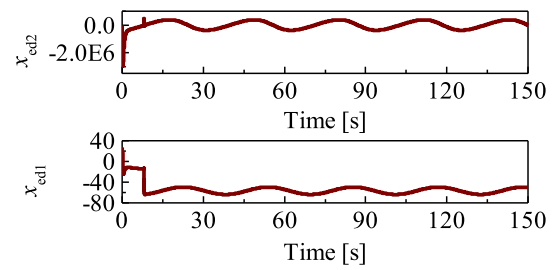

**FIGURE 9** Disturbance estimation of C-ADRC controller [Color figure can be viewed at [wileyonlinelibrary.com](http://wileyonlinelibrary.com)]

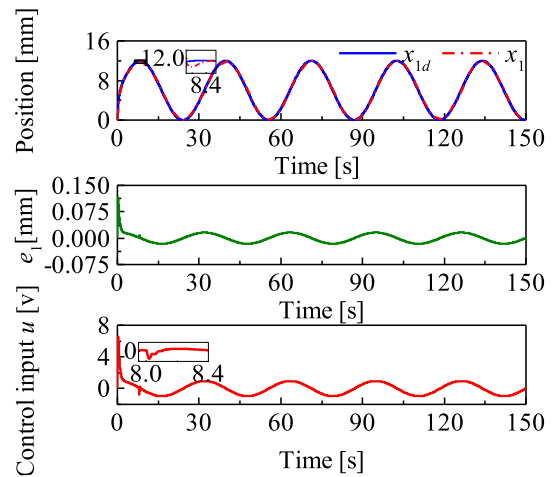

**FIGURE 10** Position tracking results and control input [Color figure can be viewed at [wileyonlinelibrary.com](http://wileyonlinelibrary.com)]

**TABLE 5** Performance indices of state tracking

| Indices | $M_e$  | $\mu_{av}$ | $\sigma_s$ |
|---------|--------|------------|------------|
| $e_1$   | 0.1154 | $1.42E-5$  | 0.01311    |
| $e_3$   | 769.17 | 0.02097    | 20.0599    |

becomes stable. Compared to the displacement, the system load force is more sensitive to external disturbances. As shown in Table 5, the maximum tracking error of the displacement is less than 0.12 mm. The maximum tracking error of load force at 8 s is approximately 12.6% of the given load force, which is less than the desired value by 0.5% after re-stabilization. The bottom curve of Figure 10 shows the control input signal changes with the disturbance, it indicates that the proposed controller has excellent active anti-disturbance ability.

Since the total disturbances of the EHA system are estimated and compensated, the proposed method shows excellent performance in both steady-state and dynamic tracking. The system output can also recover quickly under

a large sudden external disturbance. This further shows that the method has a strong disturbance rejection ability.

### 4.3 | Low-speed step input tracking

A low-speed step input with transition process is selected to validate the robustness and effectiveness of the proposed controller.

#### 4.3.1 | Simulation A: Robustness validation

To verify the robustness of the proposed controller, the following external variable disturbance load forces based on the  $x_1$  signal and time  $t$  are considered:

Case 1:  $F_L = 2000\sin(5x_1)$ ,

Case 2:  $F_L = 2000\sin(5x_1) \times \exp(0.1x_1)$ ,

Case 3:  $F_L = 5000x_1 + \sin(5x_1) + \sin(20t)$ ,

Case 4:  $F_L = x_1 + 2x_1^2 + 3x_1^3$ .

Figure 11 shows the step response results under the four variable disturbance load forces. From Figure 11, the proposed method has strong anti-disturbance property against various external disturbances. Especially in Case 1, although the displacement output  $x_t$  has small oscillation at the initial stage, the fluctuation amplitude of the displacement tracking error is small. In other words, the proposed ADRC is capable of handling various disturbances.

#### 4.3.2 | Simulation B: Effectiveness validation

To further verify the effectiveness of the proposed controller, C-ADRC proposed is compared with a cascade proportional-integral-derivative (PID) controller and a cascade backstepping controller, and the design of a backstepping controller is provided in [46]. In simulation B, the variable disturbance load force in Case 3 of simulation A is adopted. The cascade PID controller gains are  $k_{po} = 2200$ ,  $k_{io} = 1500$ ,  $k_{do} = 0.0001$ ,  $k_{pi} = 0.0537$ ,  $k_{ii} = 2$ , and  $k_{di} = 0$ , which represent the P-gain, I-gain, and D-gain of the outer-loop and inner-loop, respectively. The parameters of the backstepping controller for the outer-loop are  $b = 0.01$ ,  $c_1 = 30$ , and  $c_2 = 50$ , and the parameter for the inner-loop is  $c_3 = 125$ , which represent the control gain and tuning coefficient. The tracking results and performance indices of the three compared controllers are shown in Figure 12 and Table 6. From Figure 12 and Table 6, the tracking error of PID controller is much large compared to the other

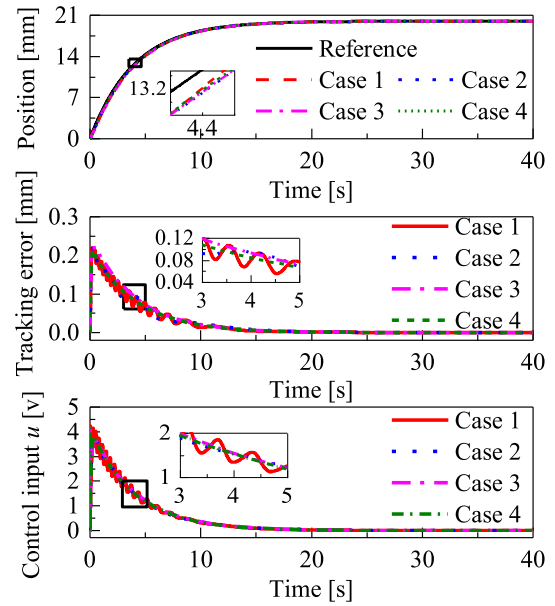

**FIGURE 11** Position tracking results for various variable disturbance load forces [Color figure can be viewed at [wileyonlinelibrary.com](http://wileyonlinelibrary.com)]

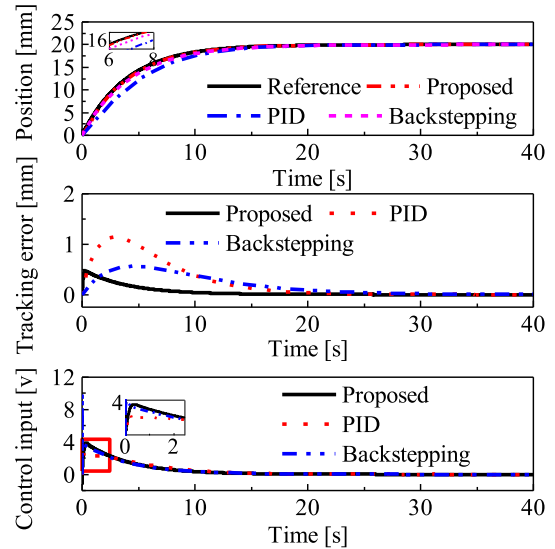

**FIGURE 12** Compared tracking results [Color figure can be viewed at [wileyonlinelibrary.com](http://wileyonlinelibrary.com)]

two controllers, and the control input of the proposed controller changes smoothly. Despite the maximum tracking error of the proposed method being slightly less than that in the backstepping controller, the performance indices of the proposed method are better in the overall period, as shown in Table 6. Comparing the performance of the three controllers, the proposed C-ADRC controller achieves the best tracking performance, which demonstrates the effectiveness of disturbance estimation and compensation of the proposed controller.

## 5 | EXPERIMENTAL VERIFICATION

The experimental platform of a single-rod EHA is shown in Figure 13. The platform consists of a spring load with  $k_t = 110$  N/mm, an EHA including a single-rod hydraulic cylinder with stroke of  $\pm 75$  mm, a displacement sensor to measure  $x_t$ , two pressure sensors to measure  $p_1$  and  $p_2$ , a INOVANCE ISMH1 series AC servo motor with maximum speed of  $\pm 3000$  r/min, a gear pump with displacement of 1.25 ml/r, and a measurement and control system. The measurement and control system consists of an industrial computer and the Advantech PCI data cards, with PCI-1713 AI card and PCI-1723 AO card.

**TABLE 6** Tracking performance indices of the three controllers

| Indices      | $M_e$   | $\mu_{av}$ | $\sigma_s$ |
|--------------|---------|------------|------------|
| C-ADRC       | 0.46946 | 0.04924    | 0.0975     |
| PID          | 1.14251 | 0.23985    | 0.35573    |
| backstepping | 0.56093 | 0.17616    | 0.18973    |

In the experiments, the nominal values of the hydraulic system parameters are the same as those in the simulation model. The parameters of the proposed ADRC are set as  $b^* = 0.01$ ,  $\omega_{o1} = 10$ ,  $\omega_{c1} = 1.5$ ,  $\omega_{o2} = 10$ , and  $\omega_{c2} = 6$ , these are obtained by real-time tuning for a given implementation. The reference position  $x_{1d}(t) = 6\sin(0.02\pi t) + 6$  is used. The experimental results of the low-speed step and the sinusoidal input are shown in Figure 14 and Figure 15, respectively. Figure 14a,b shows that the proposed method is effective, and the tracking performance of the inner-loop controller can meet the requirements of the outer-loop. As shown in Figure 14c, the two ESOs can observe the disturbance in the internal and external channels in real time. From Figure 15a, the proposed controller exhibited good dynamic tracking performance. The position error in Figure 15b and the control input in Figure 15c gradually decrease. It is worth noting that the control input fluctuates greatly when the movement direction of the EHA changes.

To verify the effectiveness of the proposed C-ADRC method, a comparison is made with the cascade PID controller and the cascade backstepping controller. In the experiments, the cascade PID controller gains of outer-

**FIGURE 13** Experimental platform of EHA [Color figure can be viewed at [wileyonlinelibrary.com](http://wileyonlinelibrary.com)]

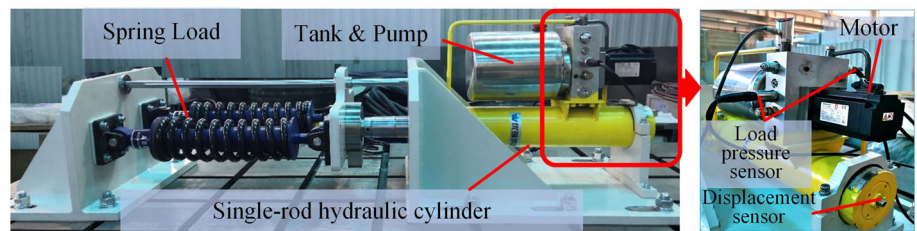

**FIGURE 14** Experimental results of the low-speed step input. (A) Reference and responses. (B) Tracking errors. (C) Estimated disturbances  $x_{ed1}$  and  $x_{ed2}$  [Color figure can be viewed at [wileyonlinelibrary.com](http://wileyonlinelibrary.com)]

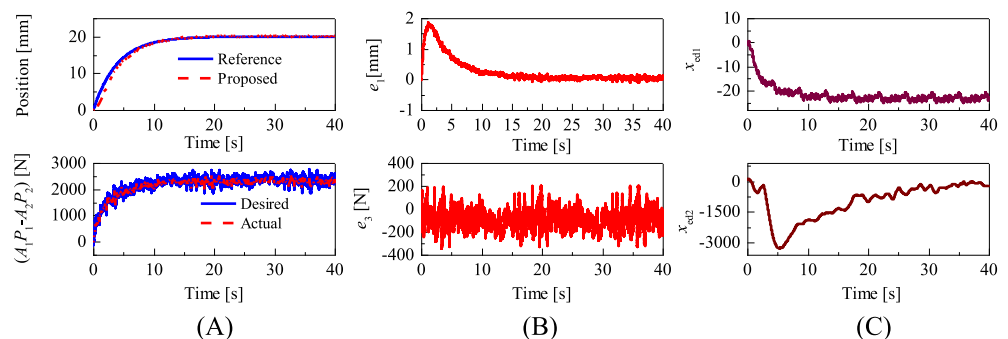

**FIGURE 15** Sinusoidal input response of the proposed method. (A) Reference and responses. (B) Tracking errors. (C) Control input [Color figure can be viewed at [wileyonlinelibrary.com](http://wileyonlinelibrary.com)]

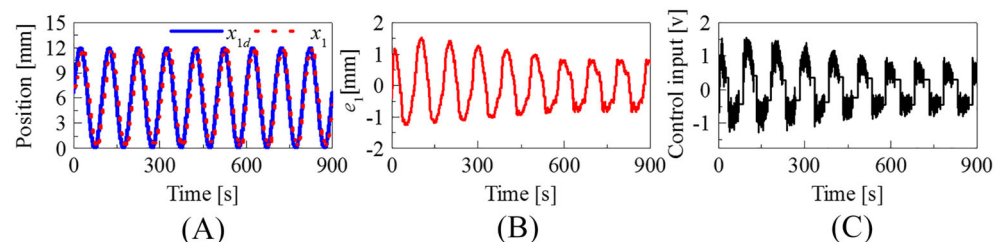



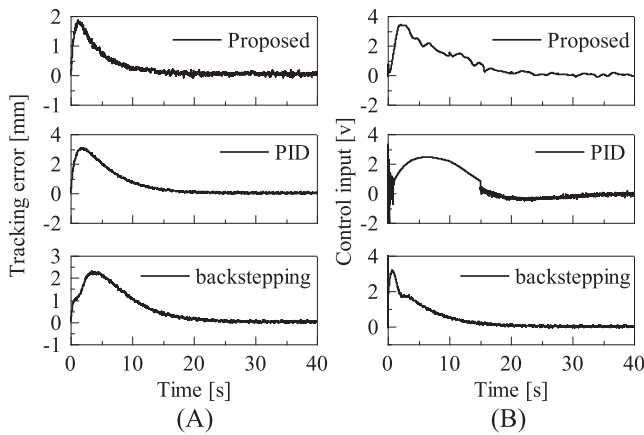

**FIGURE 16** Compared tracking errors and control input. (A) Tracking errors. (B) Control input

**TABLE 7** Performance indices of the state tracking

| Indices      | $M_e$  | $\mu_{av}$ | $\sigma_s$ |
|--------------|--------|------------|------------|
| C-ADRC       | 1.8620 | 0.2654     | 0.4217     |
| PID          | 3.0679 | 0.5720     | 0.8718     |
| backstepping | 2.2332 | 0.5302     | 0.7084     |

loop and inner-loop are  $k_{po} = 15$ ,  $k_{io} = 0.0001$ ,  $k_{do} = 0.2$ ,  $k_{pi} = 5.6$ ,  $k_{ii} = 0.1$ , and  $k_{di} = 0.002$ , respectively. The parameters of the backstepping controller for outer-loop are  $b = 0.01$ ,  $c_1 = 2$ , and  $c_2 = 5$ , and the parameter for inner-loop is  $c_3 = 10$ . The tracking performance of the three controllers is shown in Figure 16, and the performance indices of state tracking are shown in Table 7. The experimental results show that, compared to C-ADRC, the tracking errors of the PID and backstepping controllers are more significant, especially  $\mu_{av}$  and  $\sigma_s$ . The disturbance of the two channels can be estimated by two ESOs in C-ADRC, and the estimated disturbance can be compensated through the control input. Therefore, the proposed C-ADRC achieved the best tracking performance.

## 6 | CONCLUSION

In this paper, a C-ADRC method, comprising inner- and outer-loop ADRCs, was proposed to control the pressure and position of a single-rod EHA. The controller was designed to track the desired state variables, and the observers were used to estimate the state of the system using the position and pressure feedback. The results of the theoretical analysis indicate that the overall system, in the presence of various uncertainties, recovers the desired nominal performance. The simulation results

show that the proposed method has strong stability and robustness to uncertainties and external disturbances of the EHA system, and the tracking performance of the outer-loop can be improved by improving the inner-loop tracking performance owing to the independence of parameter tuning. Furthermore, the comparative experimental results illustrate the effectiveness of the proposed method. In addition, the cascade design enables the parameter range of the controller to be reduced appropriately.

## CONFLICT OF INTEREST

The authors declare that they have no known competing financial interests or personal relationships that could have appeared to influence the work reported in this paper.

## AUTHOR CONTRIBUTIONS

**Xiaoxia Han:** Conceptualization, data curation, formal analysis, methodology, software, validation. **Zhixiang Chen:** Conceptualization, formal analysis, methodology, software. **Yongbao Feng:** Conceptualization, supervision, validation. **Jian Xie:** Project administration, resources, supervision. **Xiaoling Wei:** Software. **Liejiang Wei:** Validation.

## ORCID

Xiaoxia Han  <https://orcid.org/0000-0002-2880-0419>

## REFERENCES

1. S. R. Habibi and G. Singh, *Derivation of design requirements for optimization of a high performance hydrostatic actuation system*, Int J Fluid Power **1** (2000), no. 2, 11–27. <https://doi.org/10.1080/14399776.2000.10781088>
2. J. Yao, P. Wang, Z. Dong, D. Jiang, and T. Sha, *A novel architecture of electro-hydrostatic actuator with digital distribution*, Chin. J. Aeronaut. **34** (2021), no. 5, 224–238. <https://doi.org/10.1016/j.cja.2020.08.012>
3. W. Kim and D. Won, *Nonlinear position control with nonlinear coordinate transformation using only position measurement for single-rod electro-hydrostatic actuator*, Mathematics **8** (2020), no. 8, 1273. <https://doi.org/10.3390/math8081273>
4. H. X. Zhuang, Q. L. Sun, and Z. Q. Chen, *Sliding mode control for electro-hydraulic proportional directional valve-controlled position tracking system based on an extended state observer*, Asian J Control **23** (2021), no. 4, 1855–1869. <https://doi.org/10.1002/asjc.2432>
5. M. Jerouane & F. Lamnabhi-Lagarrigue A new sliding mode controller for a hydraulic actuators, In Proceedings of the 2001 Conference on Decision and Control, 1(2001), 908–913.
6. H.-M. Chen, J.-C. Renn, and J.-P. Su, *Sliding mode control with varying boundary layers for an electro-hydraulic position servo system*, Int. J. Adv. Manuf. Technol. **26** (2005), no. 1, 117–123. <https://doi.org/10.1007/s00170-004-2145-0>
7. M. Wang, Y. Wang, R. Yang, Y. Fu, and D. Zhu, *A sliding mode control strategy for an electrohydrostatic actuator with damping*



- variable sliding surface, *Actuators* **10** (2020), no. 1, 3. <https://doi.org/10.3390/act10010003>
8. C. Guan and S. Pan, *Adaptive sliding mode control of electro-hydraulic system with nonlinear unknown parameters*, *Control Eng Practice* **16** (2008), no. 11, 1275–1284. <https://doi.org/10.1016/j.conengprac.2008.02.002>
9. Y. Lin, Y. Shi, and R. Burton, *Modeling and robust discrete-time sliding mode control design for a fluid power electro-hydraulic actuator (EHA) system*, *IEEE/ASME Trans Mechatron* **18** (2011), no. 1, 1–10. <https://doi.org/10.1109/TMECH.2011.2160959>
10. J. Yao, Z. Jiao, and D. Ma, *Extended-state-observer-based output feedback nonlinear robust control of hydraulic systems with backstepping*, *IEEE Trans Industr Electron* **61** (2014), no. 11, 6285–6293. <https://doi.org/10.1109/TIE.2014.2304912>
11. S. H. Cho and R. Burton, *Position control of high performance hydrostatic actuation system using a simple adaptive control (SAC) method*, *Mec. Dent.* **21** (2011), no. 1, 109–115. <https://doi.org/10.1016/j.mechatronics.2010.09.003>
12. H. A. Mintsa, R. Venugopal, J.-P. Kenne, and C. Belleau, *Feed-back linearization-based position control of an electrohydraulic servo system with supply pressure uncertainty*, *IEEE Trans Control Syst Technol* **20** (2011), no. 4, 1092–1099. <https://doi.org/10.1109/TCST.2011.2158101>
13. J.-H. Kwon, T.-H. Kim, J.-S. Jang, and I.-S. Lee, *Feedback linearization control of a hydraulic servo system*, In 2006 SICE-ICASE International Joint Conference, (2006), 455–460.
14. C. Kaddissi, J. Kenne, and M. Saad, *Identification and real-time control of an electrohydraulic servo system based on nonlinear backstepping*, *IEEE/ASME Trans Mechatron* **12** (2007), no. 1, 12–22. <https://doi.org/10.1109/TMECH.2006.886190>
15. L. Tian, L. Qian, and L. Chen, *Sliding mode control based on backstepping method for electro-hydraulic single-rod actuator*, In 2015 IEEE International Conference on Information and Automation, (2015) 2326–2329.
16. J. Yao, W. Deng, and Z. Jiao, *Adaptive control of hydraulic actuators with LuGre model based friction compensation*, *IEEE Trans Industr Electron* **62** (2015), no. 10, 6469–6477. <https://doi.org/10.1109/TIE.2015.2423660>
17. C. Kaddissi, J.-P. Kenne, and M. Saad, *Indirect adaptive control of an electrohydraulic servo system based on backstepping*, *IEEE/ASME Trans Mechatron* **16** (2010), no. 6, 1171–1177. <https://doi.org/10.1109/TMECH.2010.2092785>
18. X. J. Chen, D. Li, X. B. Yang, and Y. C. Yu, *Identification recurrent type 2 fuzzy wavelet neural network and L2-gain adaptive variable sliding mode robust control of electro-hydraulic servo system (EHSS)*, *Asian J Control* **20** (2018), no. 4, 1408–1490. <https://doi.org/10.1002/asjc.1643>
19. C. Guan and S. Pan, *Nonlinear adaptive robust control of single-rod electro-hydraulic actuator with unknown nonlinear parameters*, *IEEE Trans Control Syst Technol* **16** (2008), no. 3, 434–445. <https://doi.org/10.1109/TCST.2007.908195>
20. F. Bu and B. Yao, *Desired compensation adaptive robust control of single-rod electro-hydraulic actuator*, In Proceedings of the 2001 American Control Conference, 5(2001), 3926–3931.
21. J. Yao and W. Deng, *Active disturbance rejection adaptive control of hydraulic servo systems*, *IEEE Trans Industr Electron* **64** (2017), no. 10, 8023–8032. <https://doi.org/10.1109/TIE.2017.2694382>
22. W. Chen, J. Yang, L. Guo, and S. Li, *Disturbance-observer-based control and related methods: An overview*, *IEEE Trans Industr Electron* **63** (2015), no. 2, 1083–1095. <https://doi.org/10.1109/TIE.2015.2478397>
23. J. Han, *From PID to active disturbance rejection control*, *IEEE Trans Industr Electron* **56** (2009), no. 3, 900–906. <https://doi.org/10.1109/TIE.2008.2011621>
24. B. Ren, Q. Zhong, and J. Chen, *Robust control for a class of non-affine nonlinear systems based on the uncertainty and disturbance estimator*, *IEEE Trans Industr Electron* **62** (2015), no. 9, 5881–5888. <https://doi.org/10.1109/TIE.2015.2421884>
25. K. Wonhee, W. Daehee, S. Donghoon, and C. Chung, *Disturbance observer-based position tracking controller in the presence of biased sinusoidal disturbance for electrohydraulic actuators*, *IEEE Trans Control Syst Technol* **21** (2013), no. 6, 2290–2298. <https://doi.org/10.1109/TCST.2013.2237909>
26. W. Daehee, K. Wonhee, S. Donghoon, and C. Chung, *High-gain disturbance observer-based backstepping control with output tracking error constraint for electro-hydraulic systems*, *IEEE Trans Control Syst Technol* **23** (2014), no. 2, 787–795. <https://doi.org/10.1109/TCST.2014.2325895>
27. W. Xue, W. Bai, S. Yang, K. Song, Y. Huang, and H. Xie, *ADRC with adaptive extended state observer and its application to air-fuel ratio control in gasoline engines*, *IEEE Trans Industr Electron* **62** (2015), no. 9, 5847–5857. <https://doi.org/10.1109/TIE.2015.2435004>
28. W. Wei, W. Xue, and D. Li, *On disturbance rejection in magnetic levitation*, *Control Eng Practice* **82** (2019), 24–35. <https://doi.org/10.1016/j.conengprac.2018.09.018>
29. F. Beltran-Carbajal, A. Favela-Contreras, A. Valderrabano-Gonzalez, and J. C. Rosas-Caro, *Active disturbance rejection control of a magnetic suspension system*, *Asian J Control* **17** (2015), no. 3, 842–854. <https://doi.org/10.1002/asjc.934>
30. L. Sun, D. Li, K. Hu, K. Lee, and F. Pan, *On tuning and practical implementation of active disturbance rejection controller: A case study from a regenerative heater in a 1000 MW power plant*, *Industr Eng Chem Res* **55** (2016), no. 23, 6686–6695. <https://doi.org/10.1021/acs.iecr.6b01249>
31. L. Qu, W. Qiao, and L. Qu, *An extended-state-observer-based sliding-mode speed control for permanent-magnet synchronous motors*, *IEEE J Emerg Sel Topics Power Electron* **9** (2020) no. 2, 1605–1613. <https://doi.org/10.1109/TPEL.2020.3003666>
32. Q. Zheng, H. Richter, and Z. Gao, *Active disturbance rejection control for piezoelectric beam*, *Asian J Control* **16** (2014), no. 6, 1612–1622. <https://doi.org/10.1002/asjc.854>
33. S. Zhao and Z. Gao, *An active disturbance rejection based approach to vibration suppression in two-inertia system*, *Asian J Control* **15** (2013), no. 2, 350–362. <https://doi.org/10.1002/asjc.552>
34. Y. Wang, W. Zhang, H. Dong, and L. Yu, *A LADRC based fuzzy PID approach to contour error control of networked motion control system with time-varying delays*, *Asian J Control* **22** (2020), no. 5, 1973–1985. <https://doi.org/10.1002/asjc.2080>
35. Q. Zheng and Z. Gao, *Active disturbance rejection control: Some recent experimental and industrial case studies*, *Control Theory Technol* **16** (2018), no. 4, 301–313. <https://doi.org/10.1007/s11768-018-8142-x>
36. S. Shao and Z. Gao, *On the conditions of exponential stability in active disturbance rejection control based on singular*

- perturbation analysis, *Int J Control* **90** (2017), no. 10, 2085–2097. <https://doi.org/10.1080/00207179.2016.1236217>
37. S. Chen, W. Xue, S. Zhong, and Y. Huang, *On comparison of modified ADRCs for nonlinear uncertain systems with time delay*, *Sci China Inf Sci* **61** (2018), no. 7, 070223, 1–15. <https://doi.org/10.1007/s11432-017-9403-x>
  38. S. Chen and Z. Chen, *On active disturbance rejection control for a class of uncertain systems with measurement uncertainty*, *IEEE Trans Industr Electron* **68** (2020), no. 2, 1475–1485. <https://doi.org/10.1109/TIE.2020.2970623>
  39. M. Li, W. Shi, J. Wei, J. Fang, K. Guo, and Q. Zhang, *Parallel velocity control of an electro-hydraulic actuator with dual disturbance observers*, *IEEE Access* **7** (2019), 56631–56641. <https://doi.org/10.1109/ACCESS.2018.2886583>
  40. A. Li, D. Meng, B. Lu, and Q. Yang, *Nonlinear cascade control of single-rod pneumatic actuator based on an extended disturbance observer*, *J Central South Univ* **26** (2019), no. 6, 1637–1648. <https://doi.org/10.1007/s11771-019-4118-3>
  41. H. Guo, Y. Liu, G. Liu, and H. Li, *Cascade control of a hydraulically driven 6-DOF parallel robot manipulator based on a sliding mode*, *Control Eng Practice* **16** (2008) no. 9, 1055–1068. <https://doi.org/10.1016/j.conengprac.2007.11.005>
  42. M. Wang, Y. Wang, Y. Fu, R. Yang, J. Zhao, and J. Fu, *Experimental investigation of an electro-hydrostatic actuator based on the novel active compensation method*, *IEEE Access* **8** (2020), 170635–170649.
  43. Y. Li, L. Feng, and Y. Wang, *A cascade control approach to active suspension using pneumatic actuators*, *Asian J Control* **21** (2019) no. 1, 70–88. <https://doi.org/10.1002/asjc.2028>
  44. Q. Zheng, L. Gao, and Z. Gao, *On stability analysis of active disturbance rejection control for nonlinear time-varying plants with unknown dynamics*, *46th IEEE Conference on Decision and Control*, (2007), 3501–3506.
  45. P. Kokotovic, H. K. Khalil, and J. O. Reilly, *Singular perturbation methods in control analysis and design*, Academic Press, London, 1986.
  46. Y. Li, P. Zhang, D. Li, Y. Li, and L. Yang, *Backstepping adaptive control of dual-variable electro-hydraulic actuator with displacement-pressure regulation pump*, *12th IEEE Conference on Industrial Electronics and Applications (ICIEA)*, (2017) 1206–1211.

## AUTHOR BIOGRAPHIES

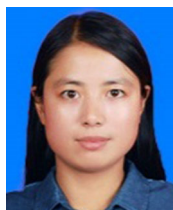

**Xiaoxia Han** received the BS degree in measurement and control technology and instruments and MS degree in mechanical and electronic engineering from the Lanzhou University of Technology, Lanzhou, China, in 2013 and 2016, respectively. She is currently pursuing the PhD degree in Rocket Force University of Engineering, Xi'an, China. Her research interests focus on control methods and thermal-hydraulic analysis of electro-hydraulic system.

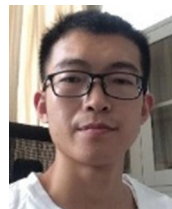

**Zhixiang Chen** received the BS, MS, and PhD degrees in mechanical engineering from Rocket Force University of Engineering, Xi'an, China. He is currently a lecturer with Department of Missile Launching and Power, Rocket Force Sergeant Academy, Weifang, China. His research interest includes the theoretical analysis and applications of the active disturbance rejection control.

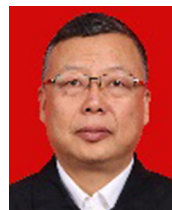

**Yongbao Feng** received his MS and PhD degrees from Xi'an Research Institute of High Technology, Xi'an, China, in 2003 and 2012, respectively. He is currently a Professor with Rocket Force University of Engineering, Xi'an, China. His research areas of interest include hydraulic testing technology, intelligent hydraulic components, and electro-hydraulic control technology.

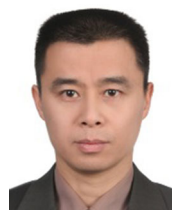

**Jian Xie** received his MS and PhD degrees from Xi'an Research Institute of High Technology, Xi'an, China, in 1997 and 2001, respectively. He is currently a Professor with the Rocket Force University of Engineering, Xi'an, China. His research areas of interest include high precision servo control, sliding mode control theory, automatic detection, and control of large hydraulic equipment.

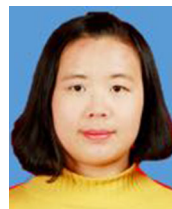

**Xiaoling Wei** received her BS degree in measurement and control technology and instruments in 2012 and her MS degree in mechanical and electronic engineering in 2015 from the Lanzhou University of Technology, Lanzhou, China. She is currently pursuing her PhD at the Rocket Force University of Engineering, Xi'an, China. Her research interests include the design, simulation and test of hydraulic components.

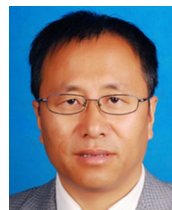

**Liejiang Wei** received his MS degree in control theory and control engineering from Gansu University of Technology, China, in 2001, and the PhD degree in fluid mechanics from the Lanzhou University of Technology, Lanzhou, China, in

2009. He works as a full-time Professor at the Lanzhou University of Technology. His research areas of interest include electro-hydraulic control system, micro-flow/micro-pressure measurement methods, fluid mechanical testing, fluid control devices, and systems.

**How to cite this article:** X. Han, Z. Chen, Y. Feng, J. Xie, X. Wei, and L. Wei, *Cascade active disturbance rejection control of single-rod electrohydrostatic actuator*, *Asian J Control* (2022), 1–17. <https://doi.org/10.1002/asjc.2815>
